# Supplementary material for: The transcription factor Xrp1 is required for PERK-mediated antioxidant gene induction in Drosophila
Source: eLife. 2021 Oct 4;10:e74047. doi: 10.7554/eLife.74047 (PMC8514241; doi:10.7554/eLife.74047)
Supplement: Source data 1. [file elife-74047-supp2.xlsx]

## Sheet: Figure2D
Genotype	gstD_GFP	se	gstD_mean
Control	1.39726	0.0967022	1
Control	1.15167
Control	1.11297
Control	0.780977
Control	0.657936
Control	0.603366
Control	1.26936
Control	1.02647
GMR>g69d	4.59907	0.491217	5.28485
GMR>g69d	7.03326
GMR>g69d	7.42443
GMR>g69d	5.95271
GMR>g69d	4.45864
GMR>g69d	5.05405
GMR>g69d	4.24503
GMR>g69d	3.51164

## Sheet: Figure 3E
Genotype	gstD_GFP
Control	15.957
Perk_OE	71.649
Perk_OE	30.186
Perk_OE	43.912
Perk_OE	35.153
Perk_OE	55.709
Perk_OE	56.112
Perk_OE	40.31
G69D_OE	77.599
G69D_OE	47.453
G69D_OE	62.657
G69D_OE	67.909
G69D_OE	57.057
G69D_OE	41.723
G69D_OE	57.127
G69D_OE	32.608
G69D_Perkmut	22.817
G69D_Perkmut	25.864
G69D_Perkmut	15.464
G69D_Perkmut	17.876
G69D_Perkmut	21.31

## Sheet: Figure 3F
	RpL15			thor (BB142F/R)			gstD1			gstD2
lacZ 0	18.64	18.87	18.62	24.65	24.56	24.65	21.62	21.88	21.86	25.04	25.18	25.29
lacZ 4	19.03	18.88	18.9	24.81	24.7	24.73	24.03	22.69	22.42	25.71	25.68	26.01
lacZ 8	18.51	18.55	18.67	22.69	22.79	22.72	21.7	21.83	21.75	24.99	25.01	25.1
PERK 0	18.58	18.65	18.73	25.21	25.12	24.91	22.25	22.01	22.36	24.24	24.17	24.29
PERK 4	18.38	18.49	18.47	23.42	23.36	23.41	21.26	21.3	21.38	24.52	24.39	24.43
PERK 8	18.64	18.64	18.7	23.1	23.01	23.08	21.11	21.19	21.87	23.94	23.89	24.08
		∆Ct (thor-RpL15)	∆∆Ct	fold change thor			∆Ct (gstD2-RpL15)	∆∆Ct	fold change gstD2		Notes:	knocked down twice each with 20ug of indicated dsRNA
	lacZ 0	5.91	0	1		lacZ 0	6.46	0	1			transfected ~48h prior to treatment with gstD1kb(WT-R1).pRHS
	lacZ 4	5.81	-0.1	1.07177		lacZ 4	6.86333	0.403333	0.756109			treated with 10ug/mL Tm for indicated number of hours
	lacZ 8	4.15667	-1.75333	3.37137		lacZ 8	6.45667	-0.00333333	1.00231			1mL of cells per treatment condition --> 50% for qPCR, 50% for WB
	PERK 0	6.42667	0	1		PERK 0	5.58	0	1			used ~1ug RNA for RT (did not DNAse treat)
	PERK 4	4.95	-1.47667	2.78305		PERK 4	6	0.42	0.747425
	PERK 8	4.40333	-2.02333	4.06522		PERK 8	5.31	-0.27	1.20581
		∆Ct (gstD1-RpL15)	∆∆Ct	fold change gstD1
	lacZ 0	3.07667	0	1
	lacZ 4	3.61833	0.541667	0.686977
	lacZ 8	3.18333	0.106667	0.928731
	PERK 0	3.55333	0	1
	PERK 4	2.86667	-0.686667	1.60956
	PERK 8	2.73	-0.823333	1.76949

## Sheet: Figure 4D, E
		RpL15			thor (BB142F/R)			gstD1			gstD2			PERK			ATF4
GFP RNAi	PQ 0h	18.88	18.73	18.93	22.68	22.63	22.59	23.8	23.74	23.75	28.02	27.74	27.81	28.07	28.05	28.11	21.13	21.1	21.17
	PQ 4h	18.81	18.5	18.39	22.28	22.27	22.14	21.28	21.44	21.25	24.55	24.54	24.56
	PQ 8h	18.44	18.34	18.42	22.1	22.04	22.06	20.4	20.42	20.79	23.57	23.49	23.6
	Tm 0h	18.95	18.89	18.93	22.54	22.47	22.41	23.89	23.81	24.29	27.77	28.25	27.79
	Tm 4h	18.73	18.79	18.76	21.59	21.6	21.53	22.02	22.09	22.16	26.03	26.11	26.05
	Tm 8h	18.45	18.47	18.41	21.34	21.27	21.27	20.98	21.03	20.93	24.75	24.94	24.79
PERK RNAi	PQ 0h	18.81	18.74	19.33	23.23	23.16	23.24	23.6	23.59	23.57	27.17	27.21	27.21	30.57	30.52	30.54
	PQ 4h	18.52	18.46	18.48	22.9	22.84	22.75	21.4	21.24	21.17	24	24.02	23.87
	PQ 8h	18.35	18.54	18.4	21.84	21.85	21.84	21.02	20.9	20.99	23.28	23.23	23.06
	Tm 0h	18.9	18.94	18.81	22.99	22.99	23.04	23.79	23.7	23.53	27.02	26.93	26.99
	Tm 4h	19.07	19.1	19.04	23.54	23.61	23.65	22.65	22.62	22.59	26.39	26.35	26.33
	Tm 8h	18.75	19.01	18.83	23.24	23.38	23.71	22.04	22.05	21.98	25.4	25.42	25.37
ATF4 RNAi	PQ 0h	18.72	18.85	18.78	24.57	24.68	24.69	23.58	23.65	23.58	26.87	26.93	26.83				24.79	24.79	24.82
	PQ 4h	18.69	18.61	18.79	25.45	25.52	25.53	21.57	21.62	21.64	24.29	24.25	24.28
	PQ 8h	18.46	18.45	18.55	25.26	25.29	25.41	21.5	21.57	21.51	23.54	23.65	23.54
	Tm 0h	18.95	18.98	18.86	24.46	24.47	24.49	23.71	23.85	23.81	26.89	27	26.86
	Tm 4h	19.01	19.09	19.09	26.47	26.55	26.52	22.75	22.92	22.88	26.07	26.15	26.18
	Tm 8h	18.99	18.98	19	26.24	26.25	26.28	22.29	22.39	22.36	24.17	24.75	24.68
			∆Ct (PERK-RpL15)	∆∆Ct	fold change PERK		GFP RNAi					PERK RNAi					ATF4 RNAi
		GFP RNAi	9.23	0	1			∆Ct (thor-RpL15)	∆∆Ct	fold change thor			∆Ct (thor-RpL15)	∆∆Ct	fold change thor			∆Ct (thor-RpL15)	∆∆Ct	fold change thor
		PERK RNAi	11.7683	2.53833	0.172141		PQ 0h	3.78667	0	1		PQ 0h	4.435	0	1		PQ 0h	5.86333	0	1
		KD efficiency	0.827859				PQ 4h	3.66333	-0.123333	1.08925		PQ 4h	4.34333	-0.0916667	1.0656		PQ 4h	6.80333	0.94	0.521233
							PQ 8h	3.66667	-0.12	1.08673		PQ 8h	3.41333	-1.02167	2.03026		PQ 8h	6.83333	0.97	0.510506
			∆Ct (ATF4-RpL15)	∆∆Ct	fold change ATF4		Tm 0h	3.55	0	1		Tm 0h	4.12333	0	1		Tm 0h	5.54333	0	1
		GFP RNAi	2.28667	0	1		Tm 4h	2.81333	-0.736667	1.66632		Tm 4h	4.53	0.406667	0.754364		Tm 4h	7.45	1.90667	0.266708
		ATF4 RNAi	6.01667	3.73	0.075363		Tm 8h	2.85	-0.7	1.6245		Tm 8h	4.58	0.456667	0.728668		Tm 8h	7.26667	1.72333	0.302848
		KD efficiency	0.924637					∆Ct (gstD1-RpL15)	∆∆Ct	fold change gstD1			∆Ct (gstD1-RpL15)	∆∆Ct	fold change gstD1			∆Ct (gstD1-RpL15)	∆∆Ct	fold change gstD1
							PQ 0h	4.91667	0	1		PQ 0h	4.81167	0	1		PQ 0h	4.82	0	1
							PQ 4h	2.75667	-2.16	4.46915		PQ 4h	2.78333	-2.02833	4.07933		PQ 4h	2.91333	-1.90667	3.74942
							PQ 8h	2.13667	-2.78	6.86852		PQ 8h	2.54	-2.27167	4.82881		PQ 8h	3.04	-1.78	3.43426
							Tm 0h	5.07333	0	1		Tm 0h	4.79	0	1		Tm 0h	4.86	0	1
							Tm 4h	3.33	-1.74333	3.34808		Tm 4h	3.55	-1.24	2.36199		Tm 4h	3.78667	-1.07333	2.10429
							Tm 8h	2.53667	-2.53667	5.80247		Tm 8h	3.16	-1.63	3.09513		Tm 8h	3.35667	-1.50333	2.83497
								∆Ct (gstD2-RpL15)	∆∆Ct	fold change gstD2			∆Ct (gstD2-RpL15)	∆∆Ct	fold change gstD2			∆Ct (gstD2-RpL15)	∆∆Ct	fold change gstD2
							PQ 0h	9.01	0	1		PQ 0h	8.42167	0	1		PQ 0h	8.09333	0	1
							PQ 4h	5.98333	-3.02667	8.14925		PQ 4h	5.47667	-2.945	7.70076		PQ 4h	5.57667	-2.51667	5.72258
							PQ 8h	5.15333	-3.85667	14.4868		PQ 8h	4.76	-3.66167	12.6553		PQ 8h	5.09	-3.00333	8.01851
							Tm 0h	9.01333	0	1		Tm 0h	8.09667	0	1		Tm 0h	7.98667	0	1
							Tm 4h	7.30333	-1.71	3.27161		Tm 4h	7.28667	-0.81	1.75321		Tm 4h	7.07	-0.916667	1.88775
							Tm 8h	6.38333	-2.63	6.19026		Tm 8h	6.53333	-1.56333	2.95536		Tm 8h	5.54333	-2.44333	5.43897

## Sheet: Figure 5I
Genotype	gstD_GFP	se
Control	1.15192	0.0693058
Control	0.709304
Control	1.33589
Control	1.32908
Control	0.835928
Control	1.10829
Control	0.812931
Control	0.868578
Control	0.947883
Control	0.900186
Perk_OE	4.34365	0.653542
Perk_OE	1.29151
Perk_OE	5.19718
Perk_OE	3.58068
Perk_OE	3.23431
Perk_Xrp1m	0.678547	0.113963
Perk_Xrp1m	1.3993
Perk_Xrp1m	0.46126
Perk_Xrp1m	0.528074
Perk_Xrp1m	0.508295
Perk_Xrp1m	0.657727
Perk_Xrp1m	0.638989
Perk_Xrp1m	0.985644
Perk_Xrp1m	1.25564

## Sheet: Figure 5E
Fig 5E
GSTD1	Exp1	Exp2	Exp3	Exp4	Exp5	Exp6	Exp7		Significant?	P value
W118 RT	1	1	1	1	1	1	1
G69D RT	2.24384	1.31392	4.19756	10.9873	5.14548	2.74273	3.15403		Yes	0.0125
XRP1 KO RT	0.762193	0.775994	1.11861	0.73441	1.02943	0.594342	0.627903		Yes	0.0093
GSTD9
W118 RT	1	1	1	1	1
G69D RT	3.59929	6.93762	2.07647	3.40651	2.10583				Yes	0.0181
XRP1 KO RT	2.33503	1.9627	0.749053	1.15065	1.95686				ns	0.0653
Jafrac1
W118 RT	1	1	1	1	1	1	1
G69D RT	2.7181	1.30365	3.07622	1.62543	3.09137	1.2319	1.60759		Yes	0.0046
XRP1 KO RT	1.19803	1.56438	2.16819	0.613277	0.589466	1.0305	1.21945		Yes	0.0353
SOD2
W118 RT	1
G69D RT	1.46546	1.30365	1.85753	1.57071	1.49807	1.28867	1.50192		Yes	<0.0001
XRP1 KO RT	1.21196	1.56438	1.0115	0.678517	0.826307	1.06176	0.825237		Yes	0.004

## Sheet: Figure 5J
Fig 5J
	Exp1	Exp2	Exp3	Exp4	Exp5	Exp6	Exp7		Significant?	P value
GSTD2
pEGFP 0 hr w RT	1	1	1
pEGFP 4 hr w RT	1.50864	2.25809	2.65325						Yes	0.0305
pEGFP 8 hr w RT	2.39368	2.35735	3.19844						Yes	0.0044
XRP1 0 hr w RT	1	1	1
XRP1 4 hr w RT	0.89861	0.607815	0.367842						Yes	0.0497
XRP1 8 hr w RT	1.19767	1.50354	1.24389						Yes	0.0117

## Sheet: Figure 5K
Fig 5K
	Exp1	Exp2	Exp3	Exp4	Exp5	Exp6	Exp7		Significant?	P value
Xrp1
NT pegfp	1	1	1						Yes	0.0004

## Sheet: Figure 6E
Fig 6E
	Exp1	Exp2	Exp3	Exp4	Exp5	Exp6	Exp7		Significant?	P value
Xrp1
LacZ	1	1	1						ns	0.4512
G69D	1.01607	1.00835	0.993781

## Sheet: Figure 8E
Fig 8E
	Exp1	Exp2	Exp3	Exp4	Exp5	Exp6	Exp7		Significant?	P value
GSTD1
WO DTT	1	1	1						Yes	0.0083
W DTT	7.96275	4.25534	6.4798
UPD3
WO DTT	1	1	1						Yes	0.0006
W DTT	3.63572	2.86776	3.19984
Tubulin
WO DTT	1	1	1
W DTT	1.18671	0.656044	1.2516						ns	0.8757

[truncated: 1 more sheets: Figure 8J]
